# Supplementary material
Source: MDPI journal article supplement (https://www.mdpi.com/2073-4441/10/2/148)
Supplement: s1 [file s1]

# A First Estimation of County-Based Green Water Availability and Its Implications for Agriculture and Bioenergy Production in the United States

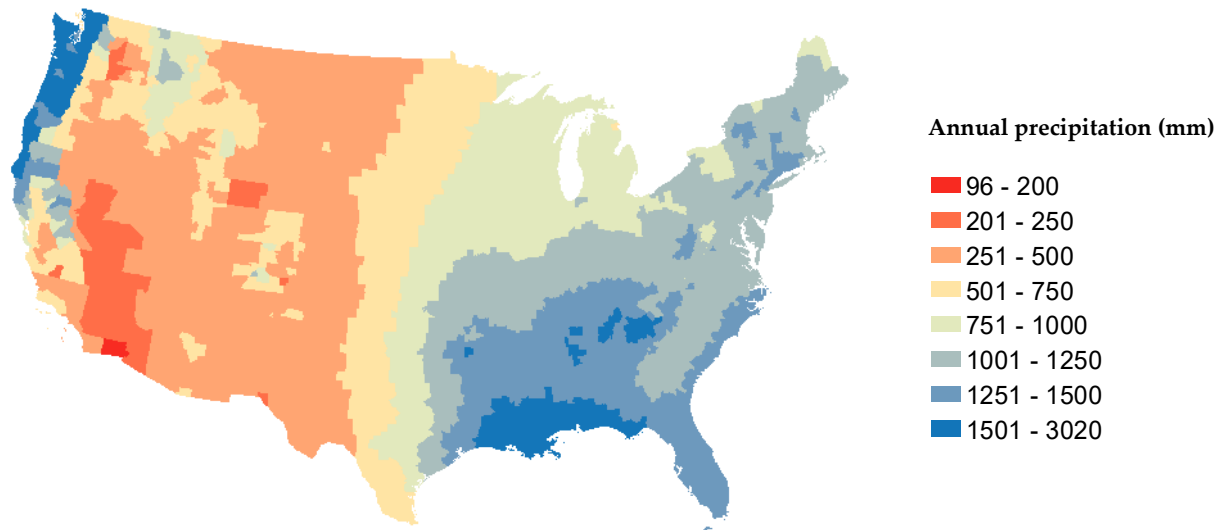

**Figure S1.** County-level 30-year (1971–2000) average annual precipitation for the conterminous United States. Data is aggregated from the gridded (800 m) PRSIM dataset [1].

## References

1. McCabe, G.J.; Wolock, D.M. Independent effects of temperature and precipitation on modeled runoff in the conterminous United States. *Water Resour. Res.* **2011**, *47*, doi:10.1029/2011WR010630.
